# Supplementary material
Source: publisher figshare collection journal article supplement (https://aacr.figshare.com/articles/dataset/_/22473176)
Supplement: Supplementary file 1 [file 39924668]

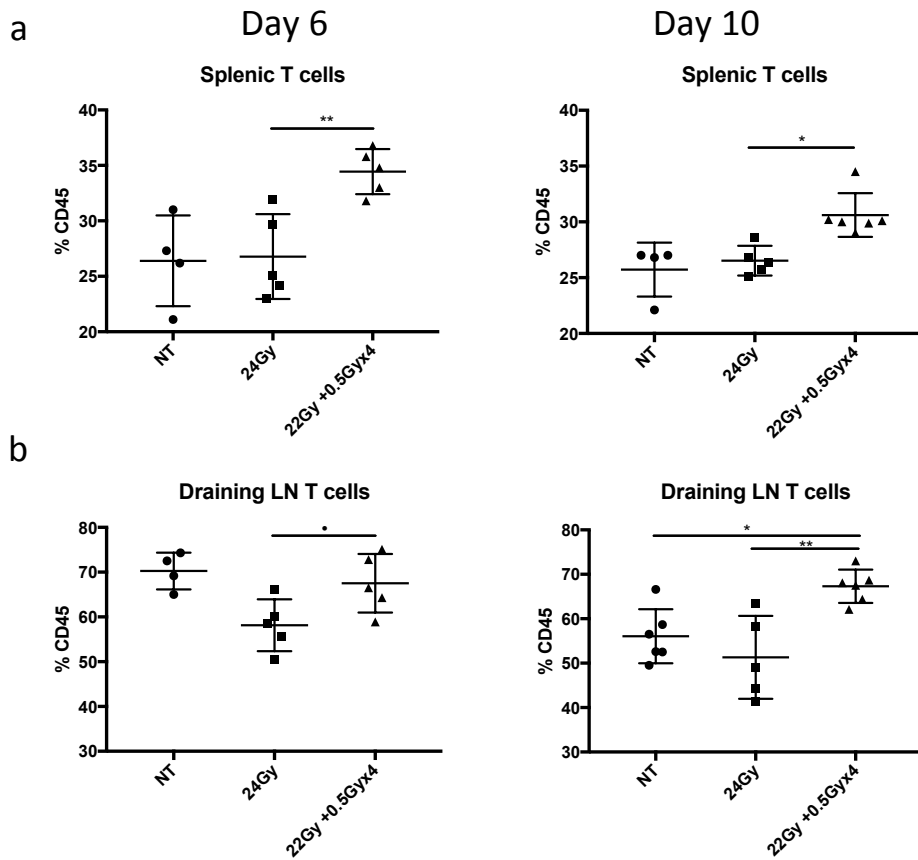

**Supplementary Figure1. Increased lymphocytes in secondary lymphoid organs**

a-b) Lymphocyte percentages at day 6 and day 10 by flow cytometry in a) spleen and b) draining lymphnode.

\*  $p < 0.05$ , \*\*  $p < 0.005$  by ANOVA multiple comparison all panels
